# Supplementary material
Source: PubMed Central journal article supplement (PMC5563819)
Supplement: NIHMS886962-supplement-Supp_-Heath_Affairs.pdf [file NIHMS886962-supplement-Supp_-Heath_Affairs.pdf]

## Appendix 1: Extended methodology

### Chronic Health States (CHS)

- **CHS-0:** Metabolically healthy (fasting blood glucose (FBG): <100 mg/L; blood pressure (BP): <130/85 mm Hg with no self-report of hypertension or antihypertensive medication; HDL cholesterol (HDL):  $\geq$ 60 mg/dL; LDL cholesterol (LDL): <130 mg/dL; triglycerides (Trig): <150 mg/dL; total cholesterol (Tchol): <200 mg/dL)
- **CHS-1:** Develop either pre-diabetes mellitus (FBG: 100-126 mg/L) only; pre-hypertension only (BP: >130/85 mm Hg & <140/90 mmHg); hypertension only (BP:  $\geq$ 140/90 mm Hg or self-report of hypertension or antihypertensive medication); hyperlipidemia only (HDL: <40 mg/dL in males and <50 mg/dL in females, LDL: 130-159 mg/dL, Trig: 150-199 mg/dL, Tchol: 200-239 mg/dL); pre-Hypertension + hyperlipidemia
- **CHS-2:** Develop either pre-diabetes mellitus (FBG:100-126 mg/L) + pre-hypertension, pre-diabetes mellitus + hypertension, pre-diabetes mellitus + hyperlipidemia (HDL:<40 mg/dL in males and <50 mg/dL in females, LDL: 130-159 mg/dL, Trig: 150-199 mg/dL, Tchol:200-239 mg/dL); pre-diabetes mellitus + pre-hypertension + hyperlipidemia; or pre-diabetes mellitus + hypertension + hyperlipidemia
- **CHS-3:** Develop either diabetes mellitus only (FBG:  $\geq$  126 mg/L or self-report of diabetes or self-report of medication); hypertension + hyperlipidemia (HDL:<40 mg/dL in males and <50 mg/dL in females, LDL:>160 mg/dL, Trig: >200 mg/dL, Tchol:>240 mg/dL)
- **CHS-4:** Develop either diabetes mellitus + hypertension; diabetes mellitus + hyperlipidemia; or diabetes mellitus + hypertension + hyperlipidemia

### Detailed description of cost calculations

Each simulated year, each agent accrued state-, health outcome-, and age-specific medical costs, productivity losses, and quality-adjusted life years (QALYs).

Direct medical costs included costs from outpatient visits, hospitalization, emergency room visits, and medications.

Indirect medical costs included productivity losses and QALYs. Productivity losses derived from annual wages attenuated by utility weights for a given health condition served as a proxy for productivity losses.

Annual QALYs for each health state were calculated using age-specific healthy QALYs attenuated by a utility value associated with the health state and/or outcome an individual developed over the year. Utility values represent the strength of individual's preferences for their own health on a scale from 0.0 (death) to 1.0 (perfect health).<sup>(1, 2)</sup> The progression of health state and resulting health outcomes will result in a decrease in the health utility value.

As the model allows for individuals to develop multiple health outcomes in each time step, we looked to attribute costs and health effects conservatively. Direct medical costs incorporated the highest cost amongst the multiple health outcomes and health effects used the lowest QALYs values. Table 1 details the cost and utility values sources.

### **Population sampling and trials**

We created a representative sample of the entire U.S. youth population of 31,741,731. For each portion of the model, we empirically determined the number of agents needed in order to be representative of the variation in the national population data and sample the stochasticity in the system. This was 6,823 and 100,000 agents for the first and second stages of the model, respectively. Similarly, we found 10 runs per scenario in part one of the model and 1000 runs per agent in part two were sufficient for producing representative results.

## **Physical Activity Intensity**

To quantify the level of intensity of PA, we used Metabolic Equivalent (METs), which ranged from 6.5 to 10.5. Moderate PA, as delineated in the “Active to a Healthy Level” and CDC recommendations, was defined as 8.5. Vigorous activity was defined as 10.

## Appendix 2: Model input parameters

| Variable                                  | Distribution type                  | Mean       | Range or standard deviation | Source            |         |
|-------------------------------------------|------------------------------------|------------|-----------------------------|-------------------|---------|
| <i>Model First Stage: Childhood Years</i> |                                    |            |                             |                   |         |
| Age distribution (years)                  | Uniform                            |            | 8-11                        | (3)               |         |
| Percentage of males                       |                                    | 49.7%      |                             |                   |         |
| Race distribution                         |                                    |            |                             |                   |         |
| White                                     |                                    | 28.16%     |                             | (3)               |         |
| Black                                     |                                    | 29.05%     |                             |                   |         |
| Others                                    |                                    | 42.79%     |                             |                   |         |
| Anthropometry                             |                                    |            |                             |                   |         |
| Height (cm)                               | Normal                             | 141.1      | 105.5-173.9                 | (3)               |         |
| Lean tissue mass (g)                      | Normal                             | 27018.74   | 14339.4- 53622.3            |                   |         |
| Fat tissue mass (g)                       | Normal                             | 12969.1    | 4029.3-41046                |                   |         |
| Probability of engaging in PA at baseline |                                    | 33.27%     |                             | (4-6)             |         |
| <i>Model Second Stage: Adult Years</i>    |                                    |            |                             |                   |         |
| General                                   | Annual wages                       | Triangular | \$48,320                    | \$37,286-\$94,873 | (7)     |
|                                           | All other cause mortality (annual) |            |                             |                   |         |
|                                           | Ages 18–24 years                   |            | 0.00076                     |                   | (8)     |
|                                           | Ages 25–34 years                   |            | 0.00106                     |                   |         |
|                                           | Ages 35–44 years                   |            | 0.00171                     |                   |         |
|                                           | Ages 45–54 years                   |            | 0.00404                     |                   |         |
|                                           | Ages 55–64 years                   |            | 0.00883                     |                   |         |
|                                           | Ages 65–74 years                   |            | 0.01918                     |                   |         |
|                                           | Ages 75–84 years                   |            | 0.05003                     |                   |         |
| Ages 85 and over                          |                                    | 0.21222    |                             |                   |         |
| CHD                                       | Mortality risk (by age)            |            |                             |                   |         |
|                                           | at CHS-2                           | Triangular | 0.01023                     | 0-0.04            | (9, 10) |
|                                           | at CHS-3                           | Triangular | 0.01193                     | 0-0.047           |         |
|                                           | at CHS-4                           | Triangular | 0.03700                     | 0.0007-0.113      |         |
|                                           | increased risk being overweight    | Triangular | 1.17500                     | 0.98-1.37         |         |
| increased risk being obese                | Triangular                         | 1.37500    | 1.3-1.45                    |                   |         |
| CHD                                       | Risk of developing CHD (by age)    |            |                             |                   |         |
|                                           | at CHS-2                           | Triangular | 0.01023                     | 0-0.04            | (9, 10) |
|                                           | at CHS-3                           | Triangular | 0.01193                     | 0-0.047           |         |
|                                           | at CHS-4                           | Triangular | 0.01813                     | 0-0.063           |         |
|                                           | increased risk being overweight    | Triangular | 1.31000                     | 1.22-1.4          | (10)    |
|                                           | increased risk being obese         | Triangular | 1.56000                     | 1.54-1.58         |         |
|                                           | Risk of recurring CHD (by age)     |            |                             |                   |         |
|                                           | at CHS-2                           | Triangular | 0.04275                     | 0-0.1             | (11)    |
|                                           | at CHS-3                           | Triangular | 0.03470                     | 0-0.057           |         |
| at CHS-4                                  | Triangular                         | 0.03970    | 0-0.074                     |                   |         |

|                      |                                     |         |             |               |             |
|----------------------|-------------------------------------|---------|-------------|---------------|-------------|
| Stroke               | Mortality risk (by age)             |         |             |               |             |
|                      | - First year                        | Uniform |             | 0.135-0.241   | (12)        |
|                      | - After First year                  | Uniform |             | 0.0596-0.1064 |             |
|                      | Risk of developing Stroke (by age)  |         |             |               |             |
|                      | at CHS-0                            | Uniform |             | 0-0.012       | (9, 10, 13) |
|                      | at CHS-1                            | Uniform |             | 0-0.015       |             |
|                      | at CHS-2                            | Uniform |             | 0-0.017       |             |
|                      | at CHS-3                            | Uniform |             | 0-0.015       |             |
|                      | at CHS-4                            | Uniform |             | 0-0.028       |             |
|                      | increased risk being overweight     | Uniform |             | 1.06-1.17     | (14, 15)    |
|                      | increased risk being obese          | Uniform |             | 1.23-1.42     |             |
|                      | Risk of recurring Stroke            |         |             |               |             |
|                      | - First year                        | Uniform |             | 0.0924-0.165  | (12)        |
|                      | - After First year                  | Uniform |             | 0.0318-0.0567 |             |
| Diabetic nephropathy | Risk by years of having T2DM        | Uniform |             | 0-0.28        | (16)        |
|                      | Probability of developing ESRD      | Uniform |             |               | (17)        |
|                      | Mortality risk from ESRD (by age)   | Uniform |             | 0.081-0.239   | (18)        |
| Diabetic neuropathy  | Risk by years of having T2DM        | Uniform |             | 0-0.72        | (16)        |
| Diabetic neuropathy  | Risk by years of having T2DM        | Uniform |             | 0             | (16)        |
|                      | Probability of developing blindness | Uniform |             | 0-0.8         | (19, 20)    |
| Cancer               | Risk of developing Cancer (female)  |         |             |               |             |
|                      | Breast                              | Uniform |             | 0-0.0191      | (21, 22)    |
|                      | Cervical                            | Uniform |             | 0-0.0007      |             |
|                      | Colorectal                          | Uniform |             | 0-0.0066      |             |
| Esophageal           | Uniform                             |         | 0-0.0004    |               |             |
| Cancer               | Renal                               | Uniform |             | 0-0.0018      | (21, 22)    |
|                      | Pancreatic                          | Uniform |             | 0-0.0025      |             |
|                      | Stomach                             | Uniform |             | 0-0.001       |             |
|                      | Uterine                             | Uniform |             | 0-0.0044      |             |
|                      | Risk of developing Cancer (male)    |         |             |               |             |
|                      | Colorectal                          | Uniform |             | 0-0.0071      | (21), (22)  |
|                      | Esophageal                          | Uniform |             | 0-0.0013      |             |
|                      | Renal                               | Uniform |             | 0-0.0031      |             |
|                      | Pancreatic                          | Uniform |             | 0-0.0025      |             |
|                      | Prostate                            | Uniform |             | 0-0.0284      |             |
|                      | Stomach                             | Uniform |             | 0-0.0017      |             |
|                      | Risk of death from Cancer (female)  |         |             |               |             |
|                      | Breast                              | Uniform |             | 0.008-0.06    | (22)        |
|                      | Cervical                            | Uniform |             | 0.006-0.083   |             |
| Colorectal           | Uniform                             |         | 0.027-0.105 |               |             |
| Esophageal           | Uniform                             |         | 0.035-0.426 |               |             |
| Renal                | Uniform                             |         | 0.011-0.057 |               |             |
| Pancreatic           | Uniform                             |         | 0.033-0.289 |               |             |

|                                    |                                  |                    |       |             |       |         |
|------------------------------------|----------------------------------|--------------------|-------|-------------|-------|---------|
|                                    | Stomach                          | Uniform            |       | 0.03-0.314  |       |         |
|                                    | Uterine                          | Uniform            |       | 0.007-0.048 |       |         |
|                                    | Risk of death from Cancer (male) |                    |       |             |       |         |
|                                    | Colorectal                       | Uniform            |       | 0.016-0.162 | (22)  |         |
|                                    | Esophageal                       | Uniform            |       | 0.018-0.409 |       |         |
|                                    | Renal                            | Uniform            |       | 0.008-0.069 |       |         |
|                                    | Pancreatic                       | Uniform            |       | 0.018-0.335 |       |         |
|                                    | Prostate                         | Uniform            |       | 0.015-0.051 |       |         |
|                                    | Stomach                          | Uniform            |       | 0.015-0.264 |       |         |
| Utility Values                     | Stroke                           | Beta               | 0.600 | 0.090       |       | (23-68) |
|                                    | CHD                              | Beta               | 0.730 | 0.100       |       |         |
|                                    | Diabetic nephropathy             | Beta               | 0.740 | 0.090       |       |         |
|                                    | Diabetic neuropathy              | Beta               | 0.650 | 0.040       |       |         |
|                                    | Diabetic retinopathy             | Beta               | 0.780 | 0.040       |       |         |
|                                    | ESRD                             | Beta               | 0.630 | 0.030       |       |         |
|                                    | Blindness                        | Beta               | 0.520 | 0.060       |       |         |
|                                    | Renal Cancer                     | Beta               | 0.700 | 0.060       |       |         |
|                                    | Cervical Cancer                  | Beta               | 0.630 | 0.110       |       |         |
|                                    | Pancreatic Cancer                | Beta               | 0.660 | 0.080       |       |         |
|                                    | Gastric Cancer                   | Beta               | 0.520 | 0.080       |       |         |
|                                    | Hypertension                     | Beta               | 0.970 | 0.010       |       |         |
|                                    | DM2                              | Beta               | 0.850 | 0.080       |       |         |
|                                    | Utility Values (Breast Cancer)   | - First year       | Beta  | 0.660       | 0.060 |         |
|                                    |                                  | - After First year | Beta  | 0.770       | 0.060 |         |
| - Last year                        |                                  | Beta               | 0.230 | 0.001       |       |         |
| Utility Values (Colon Cancer)      | - First year                     | Beta               | 0.520 | 0.120       |       |         |
|                                    | - After First year               | Beta               | 0.830 | 0.050       |       |         |
|                                    | - Last year                      | Beta               | 0.300 | 0.001       |       |         |
| Utility Values (Esophageal Cancer) | - Early years                    | Beta               | 0.710 | 0.220       |       |         |
|                                    | - Last year                      | Beta               | 0.340 | 0.001       |       |         |
| Utility Values (Uterine Cancer)    | - Early years                    | Beta               | 0.690 | 0.150       |       |         |
|                                    | - Last year                      | Beta               | 0.790 | 0.110       |       |         |
|                                    | Prostate Cancer                  | Beta               | 0.710 | 0.160       |       |         |

|                                     |                      |         |          |          |       |
|-------------------------------------|----------------------|---------|----------|----------|-------|
| Cost (\$U.S.)                       | Beta CHS-1           |         | \$497    |          | (69)  |
|                                     | Beta CHS-2           |         | \$1,123  |          |       |
|                                     | Beta CHS-3           |         | \$1,680  |          |       |
|                                     | Overweight CHS-3     |         | \$2,055  |          |       |
|                                     | Obese CHS-3          |         | \$3,930  |          |       |
|                                     | Beta CHS-4           |         | \$2,906  |          |       |
|                                     | Overweight CHS-4     |         | \$3,656  |          |       |
|                                     | Obese CHS-4          |         | \$7,406  |          |       |
| Cost (\$U.S.): CHD                  | In first year        |         |          |          |       |
|                                     | - Age 18-44 years    | Gamma   | \$19,933 | \$24,824 | (69)  |
|                                     | - Age 44- 65 years   | Gamma   | \$17,244 | \$11,109 |       |
|                                     | - Age > 65 years     | Gamma   | \$13,724 | \$9,324  |       |
|                                     | After first year     |         |          |          |       |
|                                     | - Age 18-44 years    | Gamma   | \$5,178  | \$14,673 | (69)  |
|                                     | - Age 44- 65 years   | Gamma   | \$6,926  | \$18,766 |       |
| - Age > 65 years                    | Gamma                | \$4,100 | \$11,576 |          |       |
| Cost (\$U.S.): DM2                  | - Age 18-44 years    | Gamma   | \$11,706 | \$17,764 | (69)  |
|                                     | - Age 44- 65 years   | Gamma   | \$8,109  | \$22,031 |       |
|                                     | - Age > 65 years     | Gamma   | \$1,332  | \$3,409  |       |
| Cost (\$U.S.): Hypertension         | Hypertension         |         |          |          |       |
|                                     | - Age 18-44 years    | Gamma   | \$672    | \$3,373  | (69)  |
|                                     | - Age 44- 65 years   | Gamma   | \$867    | \$3,895  |       |
|                                     | - Age > 65 years     | Gamma   | \$1,050  | \$3,901  |       |
| Cost (\$U.S.): Diabetic Nephropathy | Diabetic Nephropathy | Gamma   | \$593    | \$220    | (70)  |
|                                     | ESRD                 |         |          |          |       |
|                                     | - Initial year       | Gamma   | \$95,130 | \$31,396 | (71)  |
|                                     | - After Initial year | Gamma   | \$62,578 | \$15,802 |       |
| Cost (\$U.S.): Diabetic Neuropathy  | Gamma                | \$456   | \$323    | (69)     |       |
| Cost (\$U.S.): Diabetic Retinopathy | Diabetic Retinopathy | Gamma   | \$650    |          | \$363 |
|                                     | Blindness            | Gamma   | \$2,872  |          | \$75  |
| Cost (\$U.S.): Stroke               | - Age 18-44 years    | Gamma   | \$11,034 | \$16,744 | (69)  |
|                                     | - Age 44- 65 years   | Gamma   | \$7,643  | \$20,766 |       |
|                                     | - Age > 65 years     | Gamma   | \$7,098  | \$13,860 |       |

|                                   |                    |          |           |      |
|-----------------------------------|--------------------|----------|-----------|------|
| Cost (\$U.S.): Cancer<br>(female) | Breast             |          |           | (72) |
|                                   | - First year       |          | \$25,386  |      |
|                                   | - After First year |          | \$2,207   |      |
|                                   | - Last year        |          | \$78,570  |      |
|                                   | Cervical           |          |           |      |
|                                   | - First year       |          | \$49,692  |      |
|                                   | - After First year |          | \$1,425   |      |
|                                   | - Last year        |          | \$98,192  |      |
|                                   | Colorectal         |          |           |      |
|                                   | - First year       |          | \$56,460  |      |
|                                   | - After First year |          | \$3,159   |      |
|                                   | - Last year        |          | \$105,649 |      |
|                                   | Esophageal         |          |           |      |
|                                   | - First year       |          | \$87,486  |      |
|                                   | - After First year |          | \$6,853   |      |
|                                   | - Last year        |          | \$130,348 |      |
|                                   | Renal              |          |           |      |
|                                   | - First year       |          | \$42,237  |      |
|                                   | - After First year |          | \$6,255   |      |
|                                   | - Last year        |          | \$92,304  |      |
|                                   | Pancreatic         |          |           |      |
|                                   | - First year       |          | \$102,808 |      |
|                                   | - After First year |          | \$8,672   |      |
|                                   | - Last year        |          | \$137,426 |      |
|                                   | Stomach            |          |           |      |
|                                   | - First year       |          | \$78,184  |      |
|                                   | - After First year |          | \$3,977   |      |
|                                   | - Last year        |          | \$129,697 |      |
| Uterine                           |                    |          |           |      |
| - First year                      |                    | \$29,452 |           |      |
| - After First year                |                    | \$1,535  |           |      |
| - Last year                       |                    | \$87,719 |           |      |



|                                 |                    |           |           |      |
|---------------------------------|--------------------|-----------|-----------|------|
| Cost (\$U.S.): Cancer<br>(male) | Colorectal         |           |           | (72) |
|                                 | - First year       |           | \$25,386  |      |
|                                 | - After First year |           | \$2,207   |      |
|                                 | - Last year        |           | \$78,570  |      |
|                                 | Esophageal         |           |           |      |
|                                 | - First year       |           | \$49,692  |      |
|                                 | - After First year |           | \$1,425   |      |
|                                 | - Last year        |           | \$98,192  |      |
|                                 | Renal              |           |           |      |
|                                 | - First year       |           | \$56,460  |      |
|                                 | - After First year |           | \$3,159   |      |
|                                 | - Last year        |           | \$105,649 |      |
|                                 | Pancreatic         |           |           |      |
|                                 | - First year       |           | \$87,486  |      |
|                                 | - After First year |           | \$6,853   |      |
|                                 | - Last year        |           | \$130,348 |      |
|                                 | Prostate           |           |           |      |
|                                 | - First year       |           | \$42,237  |      |
|                                 | - After First year |           | \$6,255   |      |
|                                 | - Last year        |           | \$92,304  |      |
|                                 | Stomach            |           |           |      |
| - First year                    |                    | \$102,808 |           |      |
| - After First year              |                    | \$8,672   |           |      |
| - Last year                     |                    | \$137,426 |           |      |

## References

1. Whitehead SJ, Ali S. Health outcomes in economic evaluation: the QALY and utilities. *British medical bulletin*. 2010;96(1):5-21.
2. Nichol MB, Sengupta N, Globe DR. Evaluating quality-adjusted life years estimation of the Health Utility Index (HUI2) from the SF-36. *Medical Decision Making*. 2001;21(2):105-12.
3. Control CfD, Prevention. National Center for Health Statistics (NCHS). National Health and Nutrition Examination Survey Data. Hyattsville, MD: US Department of Health and Human Services, Centers for Disease Control and Prevention. 2007.
4. (SFIA) TSFIA. Physical Activity Council Study Reveals 33% of Americans Active to a Healthy Level: SFIA; 2013 [cited 2016 01/04/2016]. Available from: [https://www.sfia.org/press/564\\_Physical-Activity-Council-Study-Reveals-33%25-of-Americans--Active-to-a-Healthy-Level-](https://www.sfia.org/press/564_Physical-Activity-Council-Study-Reveals-33%25-of-Americans--Active-to-a-Healthy-Level-).
5. Report PACP. The Physical Activity Council's annual study tracking sports, fitness, and recreation participation in the US. 2016.
6. Association SaF. 2013 Sports, Fitness and Leisure Activities Topline Participation Report: Sports and Fitness Association; 2013 Sports and Fitness Association: Sports and Fitness Association; 2013 [cited 2016]. Available from: [www.espn.com/pdf/2013/1113/espn\\_otl\\_sportsreport.pdf](http://www.espn.com/pdf/2013/1113/espn_otl_sportsreport.pdf).
7. Bureau of Labor Statistics USDOL. Occupational Employment Statistics, : Bureau of Labor Statistics; 2015 [cited 2016 01/12/2016]. Available from: [http://www.bls.gov/oes/current/oes\\_nat.htm](http://www.bls.gov/oes/current/oes_nat.htm).
8. Human Mortality Database. In: University of California BUaMPIfDRG, editor. [www.mortality.org](http://www.mortality.org)2008.
9. D'Agostino Sr RB, Grundy S, Sullivan LM, Wilson P. Validation of the Framingham coronary heart disease prediction scores: results of a multiple ethnic groups investigation. *JAMA : the journal of the American Medical Association*. 2001;286(2):180-7.
10. Wilson PW, D'Agostino RB, Sullivan L, Parise H, Kannel WB. Overweight and obesity as determinants of cardiovascular risk: the Framingham experience. *Archives of internal medicine*. 2002;162(16):1867-72.

11. Rea TD, Heckbert SR, Kaplan RC, Smith NL, Lemaitre RN, Psaty BM. Smoking status and risk for recurrent coronary events after myocardial infarction. *Annals of Internal Medicine*. 2002;137(6):494-500.
12. Sacco RL, Shi T, Zamanillo M, Kargman D. Predictors of mortality and recurrence after hospitalized cerebral infarction in an urban community The Northern Manhattan Stroke Study. *Neurology*. 1994;44(4):626-.
13. Pender JR, Pories WJ. Epidemiology of obesity in the United States. *Gastroenterology clinics of North America*. 2005;34(1):1-7.
14. Rexrode KM, Hennekens CH, Willett WC, Colditz GA, Stampfer MJ, Rich-Edwards JW, et al. A prospective study of body mass index, weight change, and risk of stroke in women. *Jama*. 1997;277(19):1539-45.
15. Walker SP, Rimm EB, Ascherio A, Kawachi I, Stampfer MJ, Willett WC. Body size and fat distribution as predictors of stroke among US men. *American Journal of Epidemiology*. 1996;144(12):1143-50.
16. Orchard TJ, Dorman JS, Maser RE, Becker DJ, Drash AL, Ellis D, et al. Prevalence of complications in IDDM by sex and duration: Pittsburgh Epidemiology of Diabetes Complications Study II. *Diabetes*. 1990;39(9):1116-24.
17. Kiberd BA, Clase CM. Cumulative risk for developing end-stage renal disease in the US population. *Journal of the American Society of Nephrology*. 2002;13(6):1635-44.
18. Saran R, Li Y, Robinson B, Abbott KC, Agodoa L, Ayanian J, et al. US Renal Data System 2015 Annual Data Report: Epidemiology of Kidney Disease in the United States. *American journal of kidney diseases: the official journal of the National Kidney Foundation*. 2016;67(3 Suppl 1):A7.
19. Yau JW, Rogers SL, Kawasaki R, Lamoureux EL, Kowalski JW, Bek T, et al. Global prevalence and major risk factors of diabetic retinopathy. *Diabetes care*. 2012;35(3):556-64.
20. Klein R, Klein BE, Moss SE, Cruickshanks KJ. Relationship of hyperglycemia to the long-term incidence and progression of diabetic retinopathy. *Archives of internal medicine*. 1994;154(19):2169-78.

21. Fay MP, Pfeiffer R, Cronin KA, Le C, Feuer EJ. Age-conditional probabilities of developing cancer. *Statistics in medicine*. 2003;22(11):1837-48.
22. Hayat MJ, Howlader N, Reichman ME, Edwards BK. Cancer statistics, trends, and multiple primary cancer analyses from the Surveillance, Epidemiology, and End Results (SEER) Program. *The oncologist*. 2007;12(1):20-37.
23. Adarkwah CC, Gandjour A, Akkerman M, Evers S. To treat or not to treat? Cost-effectiveness of ace inhibitors in non-diabetic advanced renal disease-a Dutch perspective. *Kidney and Blood Pressure Research*. 2013;37(2-3):168-80.
24. Aspinall SL, Smith KJ, Good CB, Zhao X, Stone RA, Tonnu-Mihara IQ, et al. Incremental cost effectiveness of pharmacist-managed erythropoiesis-stimulating agent clinics for non-dialysis-dependent chronic kidney disease patients. *Applied health economics and health policy*. 2013;11(6):653-60.
25. Athanasakis K, Petrakis I, Karampli E, Vitsou E, Lyras L, Kyriopoulos J. Pregabalin versus gabapentin in the management of peripheral neuropathic pain associated with post-herpetic neuralgia and diabetic neuropathy: a cost effectiveness analysis for the Greek healthcare setting. *BMC neurology*. 2013;13(1):1.
26. Attard CL, Brown S, Alloul K, Moore MJ. Cost-effectiveness of FOLFIRINOX for first-line treatment of metastatic pancreatic cancer. *Current Oncology*. 2013;21(1):41-51.
27. Bellows BK, Dahal A, Jiao T, Biskupiak J. A cost-utility analysis of pregabalin versus duloxetine for the treatment of painful diabetic neuropathy. *Journal of pain & palliative care pharmacotherapy*. 2012;26(2):153-64.
28. Boger PC, Turner D, Roderick P, Patel P. A UK-based cost-utility analysis of radiofrequency ablation or oesophagectomy for the management of high-grade dysplasia in Barrett's oesophagus. *Alimentary pharmacology & therapeutics*. 2010;32(11-12):1332-42.
29. Borisenko O, Beige J, Lovett EG, Hoppe UC, Bjessmo S. Cost-effectiveness of Barostim therapy for the treatment of resistant hypertension in European settings. *Journal of hypertension*. 2014;32(3):681-92.

30. Botteman M, Meijboom M, Foley I, Stephens J, Chen Y, Kaura S. Cost-effectiveness of zoledronic acid in the prevention of skeletal-related events in patients with bone metastases secondary to advanced renal cell carcinoma: application to France, Germany, and the United Kingdom. *The European Journal of Health Economics*. 2011;12(6):575-88.
31. Bresse X, Goergen C, Prager B, Joura E. Universal vaccination with the quadrivalent HPV vaccine in Austria: impact on virus circulation, public health and cost-effectiveness analysis. *Expert review of pharmacoeconomics & outcomes research*. 2014;14(2):269-81.
32. Brown ST, Grima DG, Sauriol L. Cost-effectiveness of insulin glargine versus sitagliptin in insulin-naïve patients with type 2 diabetes mellitus. *Clinical therapeutics*. 2014;36(11):1576-87.
33. Choudhry NK, Patrick AR, Glynn RJ, Avorn J. The cost-effectiveness of C-reactive protein testing and rosuvastatin treatment for patients with normal cholesterol levels. *Journal of the American College of Cardiology*. 2011;57(7):784-91.
34. Das A, Ngamruengphong S, Nagendra S, Chak A. Asymptomatic pancreatic cystic neoplasm: a cost-effectiveness analysis of different strategies of management. *Gastrointestinal endoscopy*. 2009;70(4):690-9. e6.
35. Dorian P, Kongnakorn T, Phatak H, Rublee DA, Kuznik A, Lanitis T, et al. Cost-effectiveness of apixaban vs. current standard of care for stroke prevention in patients with atrial fibrillation. *European heart journal*. 2014:ehu006.
36. Folse HJ, Goswami D, Rengarajan B, Budoff M, Kahn R. Clinical-and cost-effectiveness of LDL particle-guided statin therapy: A simulation study. *Atherosclerosis*. 2014;236(1):154-61.
37. Fonseca T, Clegg J, Caputo G, Norrbacka K, Dilla T, Alvarez M. The cost-effectiveness of exenatide once weekly compared with exenatide twice daily and insulin glargine for the treatment of patients with type two diabetes and body mass index  $\geq 30$  kg/m<sup>2</sup> in Spain. *Journal of medical economics*. 2013;16(7):926-38.
38. Gladwell D, Henry T, Cook M, Akehurst R. Cost effectiveness of renal denervation therapy for the treatment of resistant hypertension in the UK. *Applied health economics and health policy*. 2014;12(6):611-22.

39. Gomes M, Aldridge RW, Wylie P, Bell J, Epstein O. Cost-effectiveness analysis of 3-D computerized tomography colonography versus optical colonoscopy for imaging symptomatic gastroenterology patients. *Applied health economics and health policy*. 2013;11(2):107-17.
40. Green LE, Dinh TA, Hinds DA, Walser BL, Allman R. Economic Evaluation of Using a Genetic Test to Direct Breast Cancer Chemoprevention in White Women with a Previous Breast Biopsy. *Applied health economics and health policy*. 2014;12(2):203-17.
41. Hoyle M, Green C, Thompson-Coon J, Liu Z, Welch K, Moxham T, et al. Cost-Effectiveness of Temsirolimus for First Line Treatment of Advanced Renal Cell Carcinoma. *Value in Health*. 2010;13(1):61-8.
42. Kaambwa B, Bryan S, Jowett S, Mant J, Bray EP, Hobbs FR, et al. Telemonitoring and self-management in the control of hypertension (TASMINH2): a cost-effectiveness analysis. *European journal of preventive cardiology*. 2013:2047487313501886.
43. Kohn CG, Parker MW, Limone BL, Coleman CI. Cost-effectiveness of ranolazine added to standard-of-care treatment in patients with chronic stable angina pectoris. *The American journal of cardiology*. 2014;113(8):1306-11.
44. Kondo M, Yamagata K, Hoshi S-L, Saito C, Asahi K, Moriyama T, et al. Cost-effectiveness of chronic kidney disease mass screening test in Japan. *Clinical and experimental nephrology*. 2012;16(2):279-91.
45. Kongnakorn T, Lanitis T, Annemans L, Thijs V, Goethals M, Marbaix S, et al. Stroke and systemic embolism prevention in patients with atrial fibrillation in Belgium: comparative cost effectiveness of new oral anticoagulants and warfarin. *Clinical drug investigation*. 2015;35(2):109-19.
46. Kreidieh B, Rodríguez-Mañero M, Ibarra-Cortez SH, Schurmann P, Valderrábano M. The Cost Effectiveness of LAA Exclusion. *JAFIB: Journal of Atrial Fibrillation*. 2016;8(5).
47. Krzyzanowska MK, Earle CC, Kuntz KM, Weeks JC. Using economic analysis to evaluate the potential of multimodality therapy for elderly patients with locally advanced pancreatic cancer. *International Journal of Radiation Oncology\* Biology\* Physics*. 2007;67(1):211-8.

48. Kwon JS, Carey MS, Goldie SJ, Kim JJ. Cost-effectiveness analysis of treatment strategies for Stage I and II endometrial cancer. *Journal of Obstetrics and Gynaecology Canada*. 2007;29(2):131-9.
49. Lairson DR, Parikh RC, Cormier JN, Chan W, Du XL. Cost–Utility Analysis of Chemotherapy Regimens in Elderly Patients with Stage III Colon Cancer. *Pharmacoeconomics*. 2014;32(10):1005-13.
50. Lee CI, Cevik M, Alagoz O, Sprague BL, Tosteson AN, Miglioretti DL, et al. Comparative effectiveness of combined digital mammography and tomosynthesis screening for women with dense breasts. *Radiology*. 2014;274(3):772-80.
51. Masterton RG, Casamayor M, Musingarimi P, van Engen A, Zinck R, Odufowora-Sita O, et al. De-escalation from micafungin is a cost-effective alternative to traditional escalation from fluconazole in the treatment of patients with systemic Candida infections. *Journal of medical economics*. 2013.
52. Melnikow J, Birch S, Slee C, McCarthy TJ, Helms LJ, Kuppermann M. Tamoxifen for breast cancer risk reduction: impact of alternative approaches to quality-of-life adjustment on cost-effectiveness analysis. *Medical care*. 2008;46(9):946-53.
53. Morais J, Aguiar C, McLeod E, Chatzitheofilou I, Santos IF, Pereira S. Cost-effectiveness of rivaroxaban for stroke prevention in atrial fibrillation in the Portuguese setting. *Revista Portuguesa de Cardiologia*. 2014;33(9):535-44.
54. Murphy JD, Chang DT, Abelson J, Daly ME, Yeung HN, Nelson LM, et al. Cost-effectiveness of modern radiotherapy techniques in locally advanced pancreatic cancer. *Cancer*. 2012;118(4):1119-29.
55. Pataky R, Ismail Z, Coldman AJ, Elwood M, Gelmon K, Hedden L, et al. Cost-effectiveness of annual versus biennial screening mammography for women with high mammographic breast density. *Journal of medical screening*. 2014;21(4):180-8.
56. Paz-Ares L, Del Muro J, Grande E, Diaz S. A cost-effectiveness analysis of sunitinib in patients with metastatic renal cell carcinoma intolerant to or experiencing disease progression on immunotherapy: perspective of the Spanish National Health System. *Journal of clinical pharmacy and therapeutics*. 2010;35(4):429-38.

57. Pietzsch JB, Liu S, Garner AM, Kezirian EJ, Strollo PJ. Long-Term Cost-Effectiveness of Upper Airway Stimulation for the Treatment of Obstructive Sleep Apnea: A Model-Based Projection Based on the STAR Trial. *Sleep*. 2015;38(5):735-44.
58. Rachapelle S, Legood R, Alavi Y, Lindfield R, Sharma T, Kuper H, et al. The cost–utility of telemedicine to screen for diabetic retinopathy in India. *Ophthalmology*. 2013;120(3):566-73.
59. Rupnow MF, Chang AH, Shachter RD, Owens DK, Parsonnet J. Cost-effectiveness of a potential prophylactic *Helicobacter pylori* vaccine in the United States. *Journal of Infectious Diseases*. 2009;200(8):1311-7.
60. Schaufler TM, Wolff M. Cost effectiveness of preventive screening programmes for type 2 diabetes mellitus in Germany. *Applied health economics and health policy*. 2010;8(3):191-202.
61. Scotland GS, McNamee P, Fleming AD, Goatman KA, Philip S, Prescott GJ, et al. Costs and consequences of automated algorithms versus manual grading for the detection of referable diabetic retinopathy. *British Journal of Ophthalmology*. 2010;94(6):712-9.
62. Sharaiha RZ, Freedberg DE, Abrams JA, Wang YC. Cost-effectiveness of chemoprevention with proton pump inhibitors in Barrett’s esophagus. *Digestive diseases and sciences*. 2014;59(6):1222-30.
63. Wilson FA, Villarreal R, Stimpson JP, Pagán JA. Cost-effectiveness analysis of a colonoscopy screening navigator program designed for Hispanic men. *Journal of Cancer Education*. 2015;30(2):260-7.
64. Wisløff T, Hagen G, Klemp M. Economic evaluation of warfarin, dabigatran, rivaroxaban, and apixaban for stroke prevention in atrial fibrillation. *Pharmacoeconomics*. 2014;32(6):601-12.
65. Wu B, Kun L, Liu X, He B. Cost–Effectiveness of Different Strategies for Stroke Prevention in Patients with Atrial Fibrillation in a Health Resource-Limited Setting. *Cardiovascular drugs and therapy*. 2014;28(1):87-98.
66. Xie F, O'Reilly D, Ferrusi IL, Blackhouse G, Bowen JM, Tarride J-E, et al. Illustrating economic evaluation of diagnostic technologies: comparing *Helicobacter pylori* screening strategies in prevention of gastric cancer in Canada. *Journal of the American College of Radiology*. 2009;6(5):317-23.



67. Yang KY, Caughey AB, Little SE, Cheung MK, Chen L-M. A cost-effectiveness analysis of prophylactic surgery versus gynecologic surveillance for women from hereditary non-polyposis colorectal cancer (HNPCC) families. *Familial cancer*. 2011;10(3):535-43.
68. Zhou HJ, Dan YY, Naidoo N, Li SC, Yeoh KG. A cost-effectiveness analysis evaluating endoscopic surveillance for gastric cancer for populations with low to intermediate risk. *PLoS one*. 2013;8(12):e83959.
69. Quality AfHRA. Medical Expenditure Panel Survey In: Quality AfHRA, editor.: Agency for Healthcare Research and Quality; 2012.
70. Gordois A, Scuffham P, Shearer A, Oglesby A. The health care costs of diabetic nephropathy in the United States and the United Kingdom. *Journal of diabetes and its complications*. 2004;18(1):18-26.
71. NIH. Annual Data Report: Atlas of Chronic Kidney Disease and End-Stage Renal Disease in the United States. Bethesda, MD: 2013.
72. Yang D, Li T, Liu Z, Arbez N, Yan J, Moran TH, et al. LRRK2 kinase activity mediates toxic interactions between genetic mutation and oxidative stress in a *Drosophila* model: suppression by curcumin. *Neurobiology of disease*. 2012;47(3):385-92.
